# Supplementary material
Source: publisher figshare collection journal article supplement (https://acs.figshare.com/ndownloader/files/16442237)
Supplement: Supplementary file 1 [file 16442237]

## Supporting Information

### Multiple Transitions of Charge Density Wave Order in Epitaxial Few-layered 1T'-VTe<sub>2</sub> Films

Tian Dai<sup>1</sup>, Songdan Kang<sup>1</sup>, Xingyuan Ma<sup>1</sup>, Shuai Dang<sup>1</sup>, Hongwei Li<sup>1</sup>, Zilin Ruan<sup>2</sup>,  
Wenqi Zhou<sup>1</sup>, Ping Hu<sup>3</sup>, Shuwei Li<sup>1</sup>, Shuxiang Wu<sup>1\*</sup> (wushx3@mail.sysu.edu.cn)

<sup>1</sup>*State Key Laboratory of Optoelectronic Materials and Technologies, School of Materials Science and Engineering, Sun Yat-Sen University, Guangzhou 510275, People's Republic of China*

<sup>2</sup>*School of materials Science and Engineering, Kunming University of Science and technology, Kunming, 650093, People's Republic of China*

<sup>3</sup>*School of Electronic Information and Electrical Engineering, Huizhou University, No.46, Yanda Road, Huizhou City, 516000, People's Republic of China*

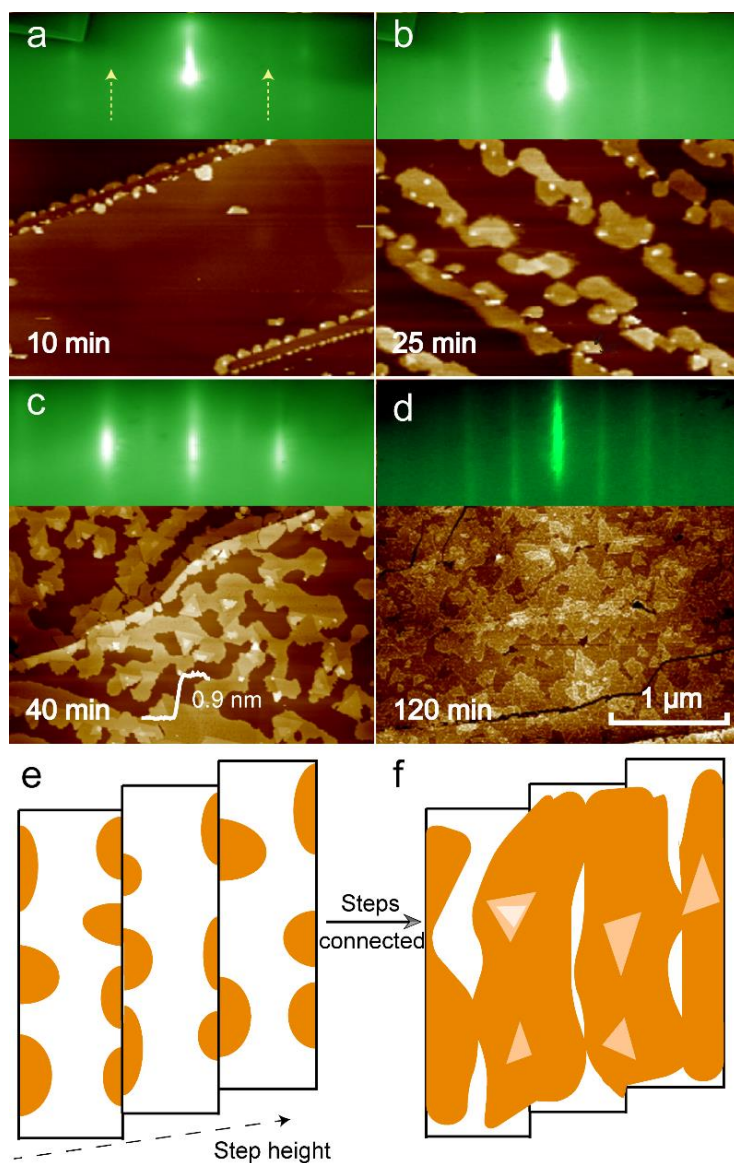

**Figure S1.** Surface topography measured by AFM and corresponding in situ RHEED patterns at different growth periods for the layer-by-layer epitaxial growth of  $\text{VTe}_2$  thin films on HOPG substrates. (a) After growth of 10 min, RHEED streaks of  $\text{VTe}_2$  films emerged and the coverage rate is approximately 3 %. (b) After growth of 25 min, with the coverage of ~40 %. (c) After growth of 40 min, the RHEED streaks of the substrates were disappeared and the monolayer  $\text{VTe}_2$  film was obtained. (d) After growth of 120 min, shows an approximately 3 layer  $\text{VTe}_2$  films with uneven coverage. (e), (f) Growth mode of  $\text{VTe}_2$  films on HOPG.

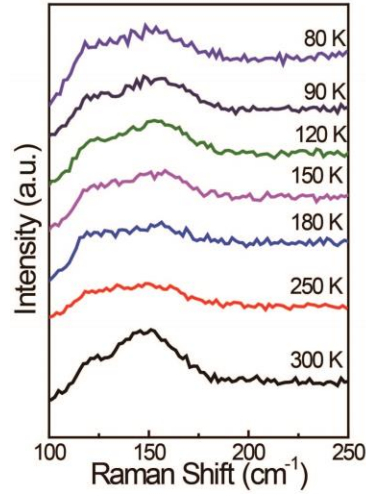

**Figure S2.** Temperature dependent Raman shift of monolayer VTe<sub>2</sub> films, the A<sub>1g</sub> peak became too broad to identify the peak position, while the peaks are still detectable.

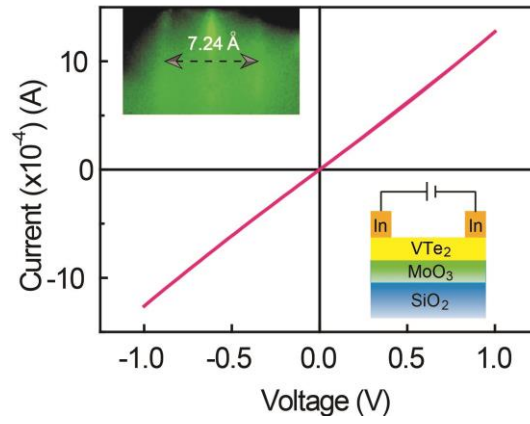

**Figure S3.** I-V curve and RHEED patterns of VTe<sub>2</sub> grown on MoO<sub>3</sub>, indicating the same structure as VTe<sub>2</sub> grown on HOPG and graphene.
